# Supplementary material
Source: ML conference proceedings conference paper supplement (https://openreview.net/forum?id=vjaGQ4cftD)

Chair

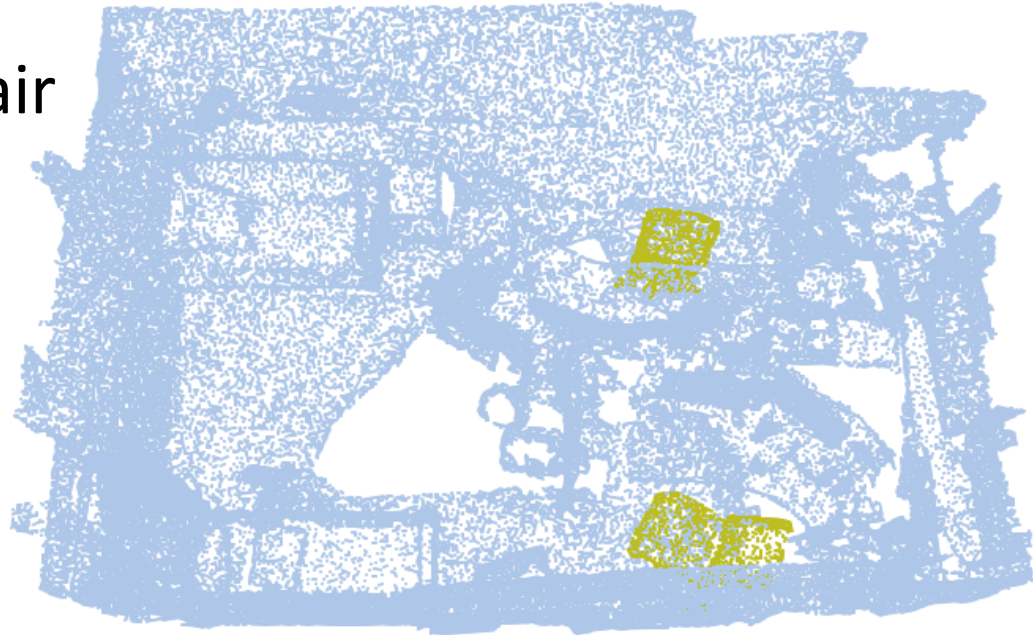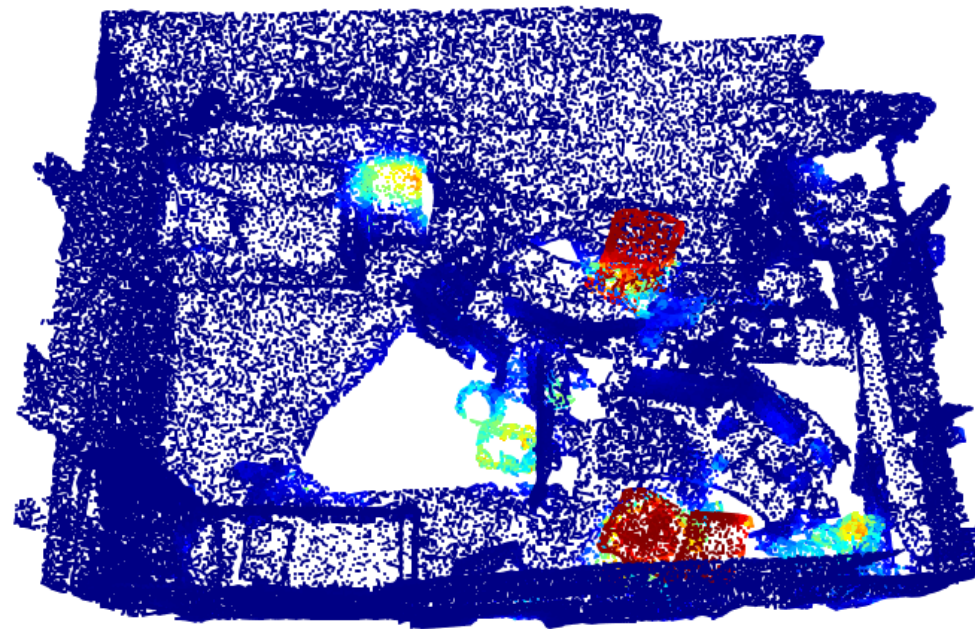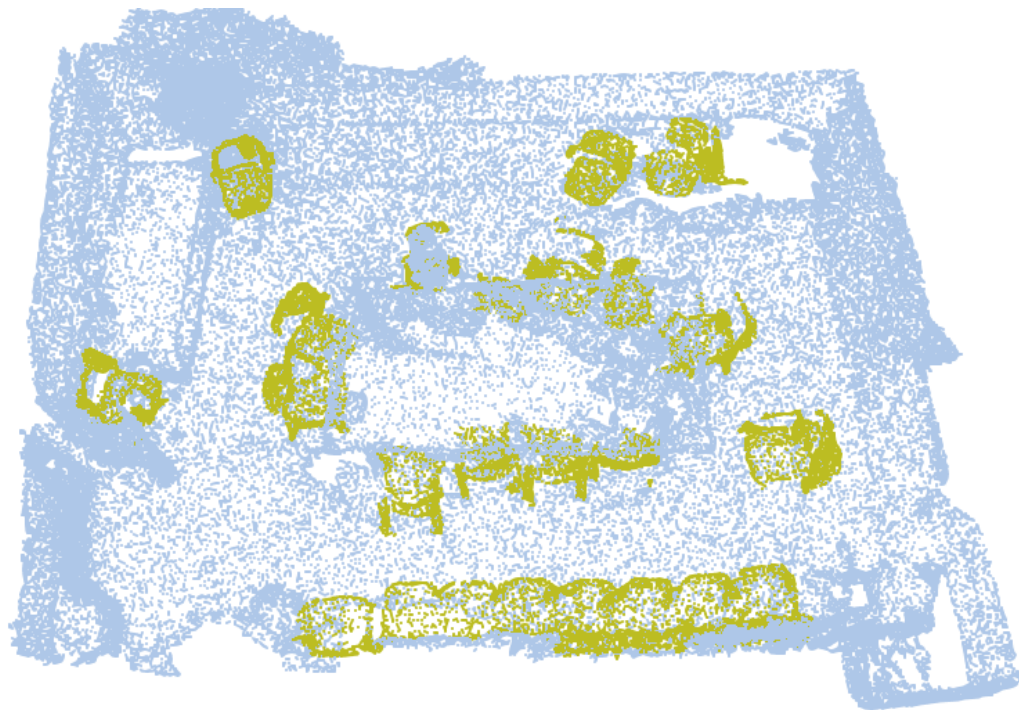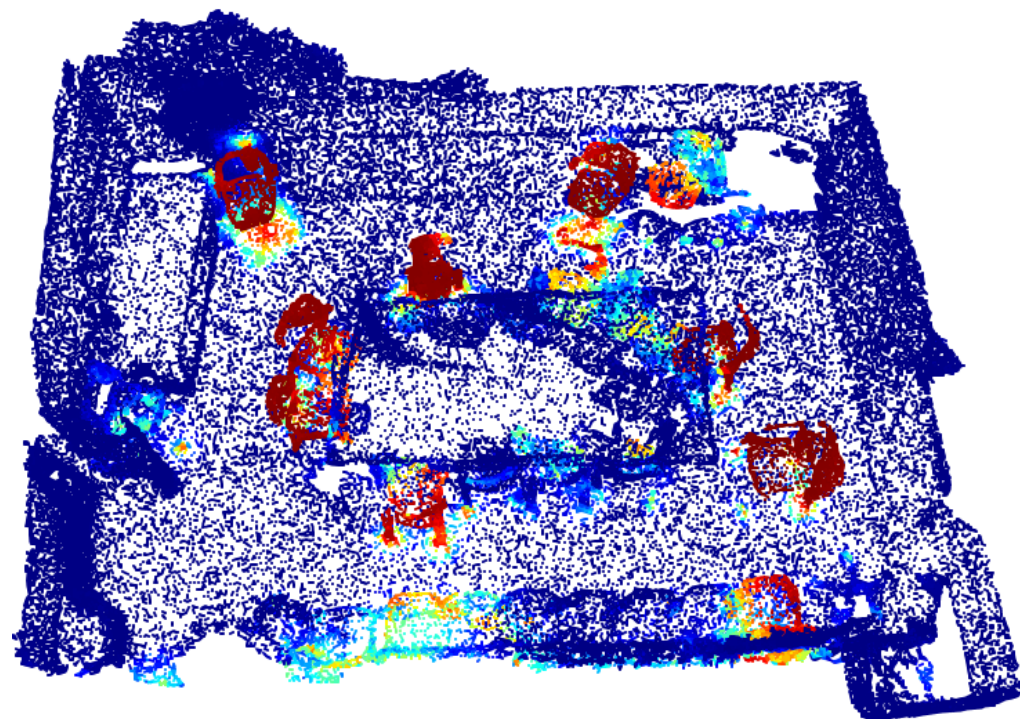



Chair

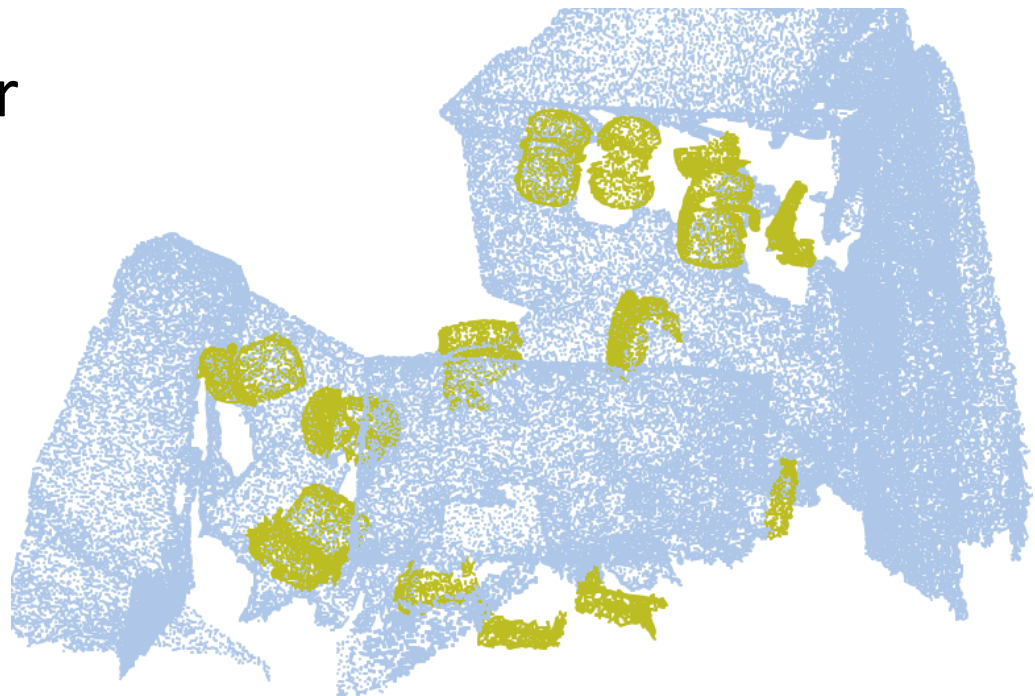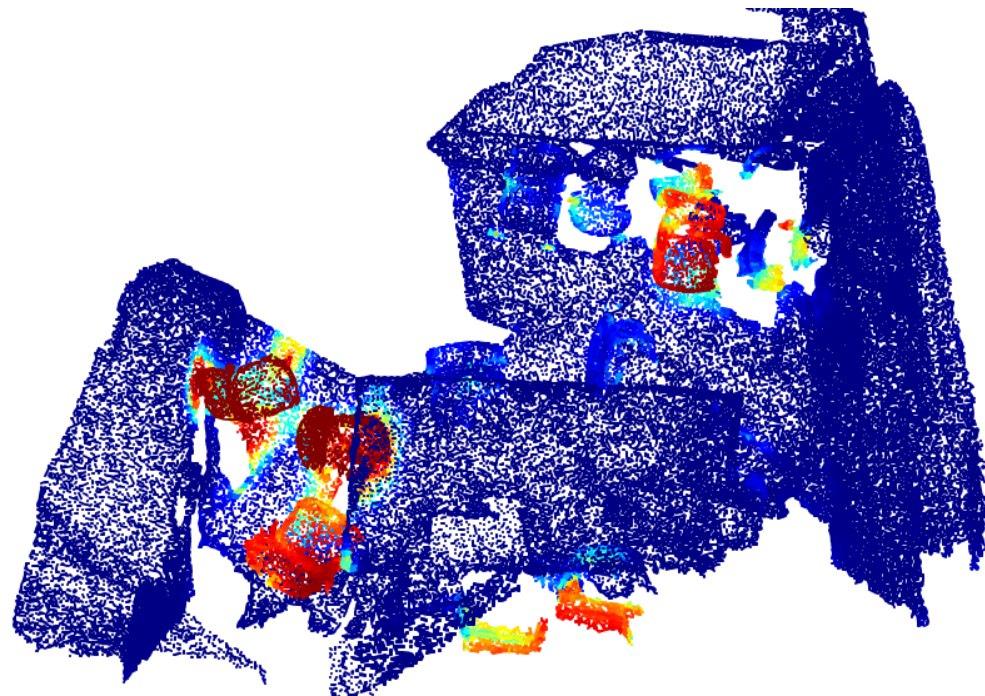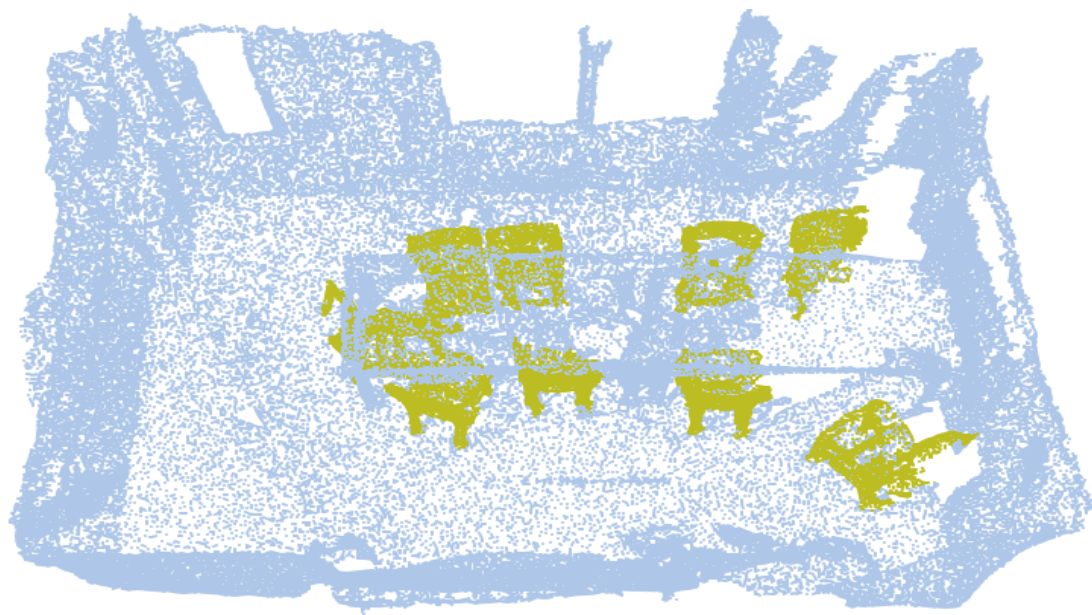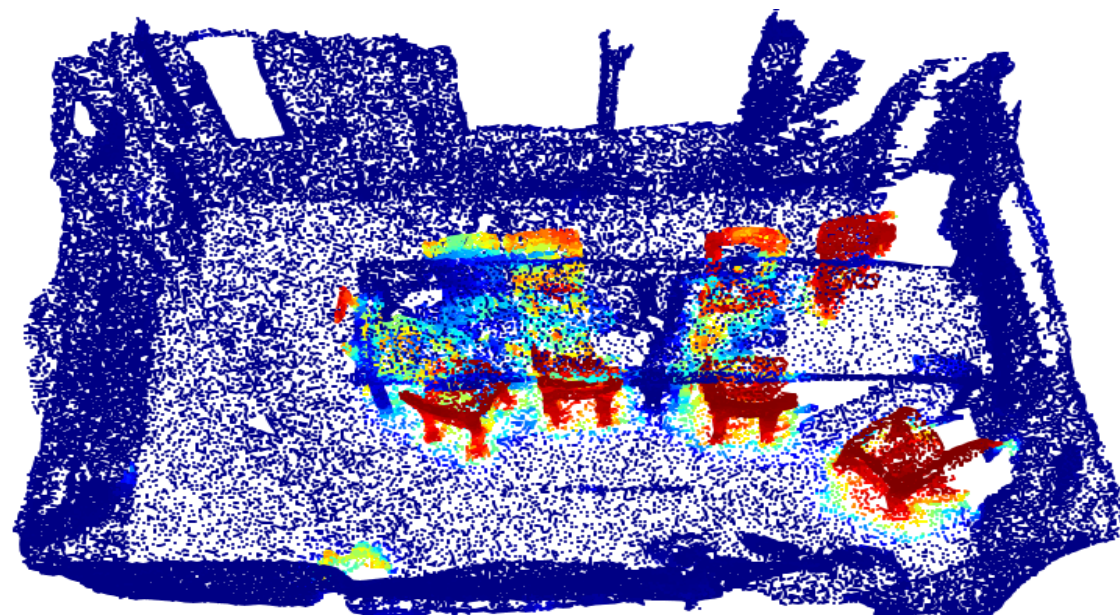



Chair

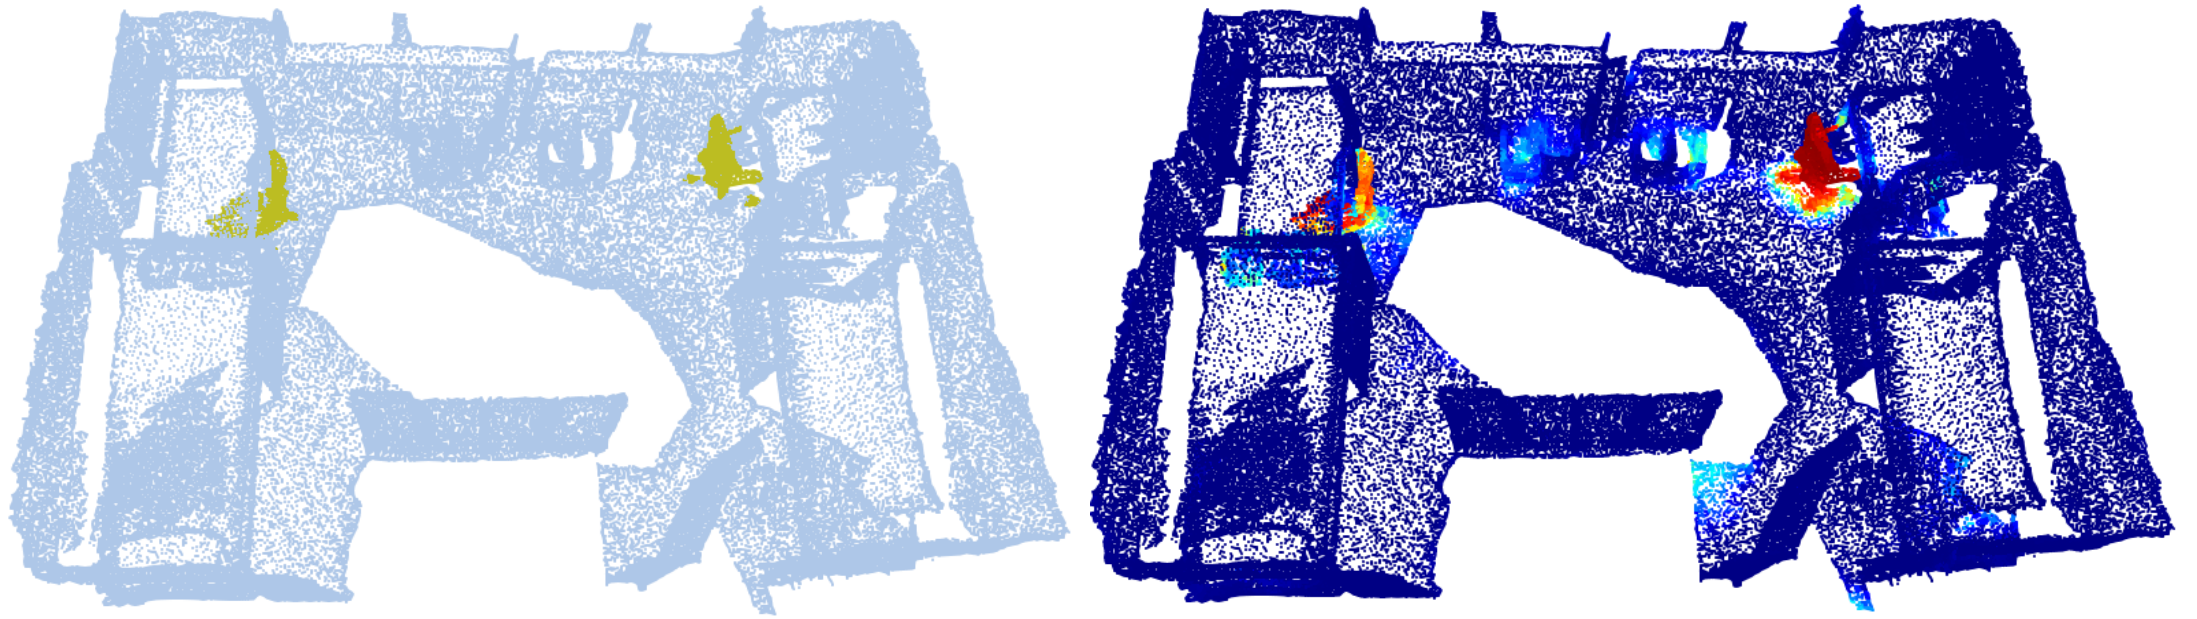

# Bookshelf

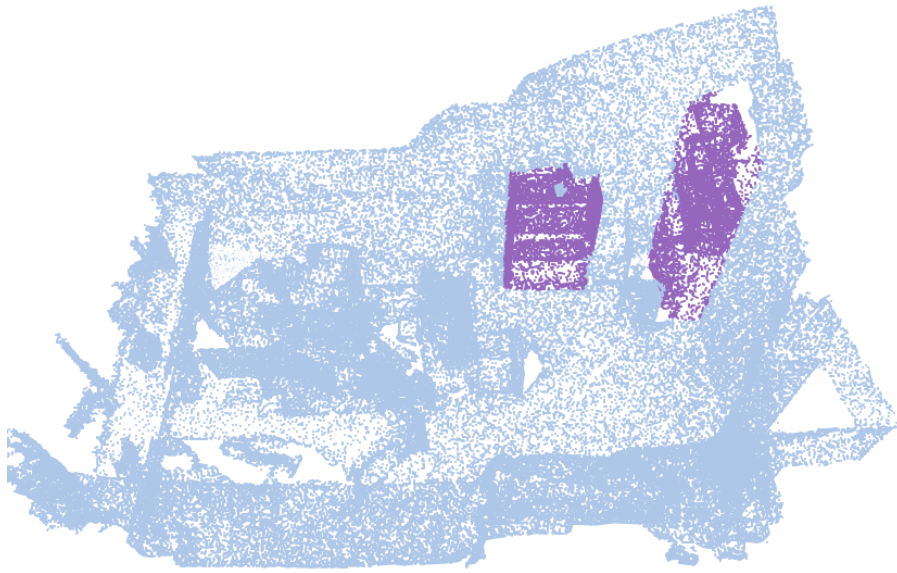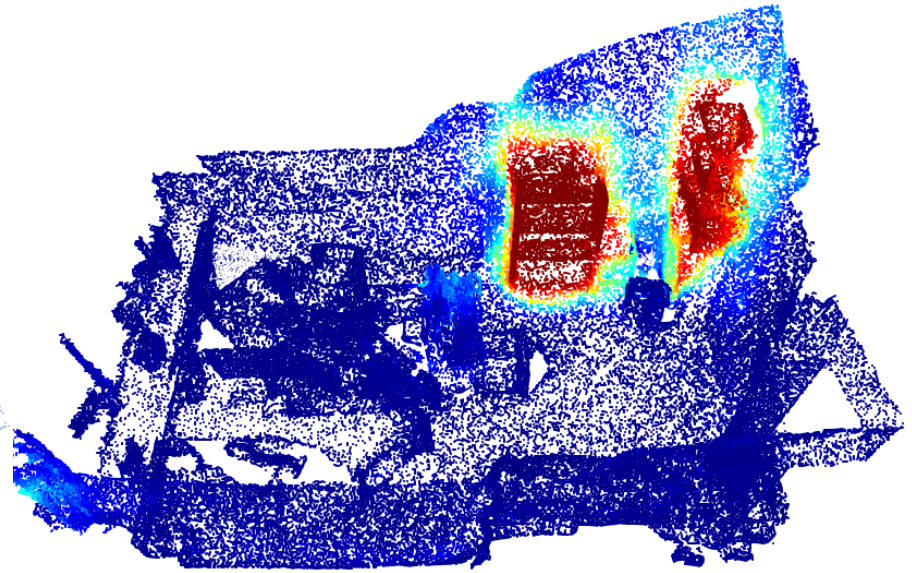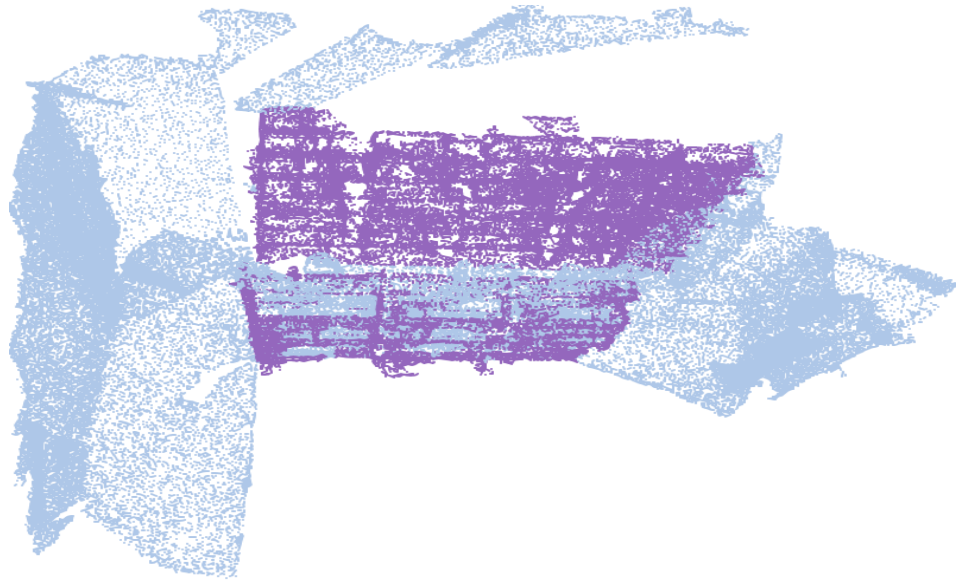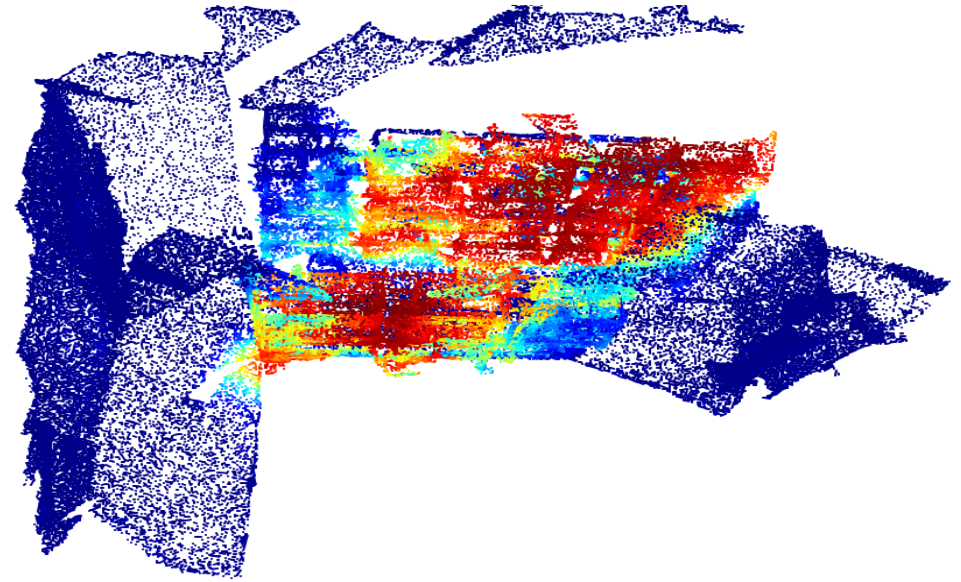



Bookshelf

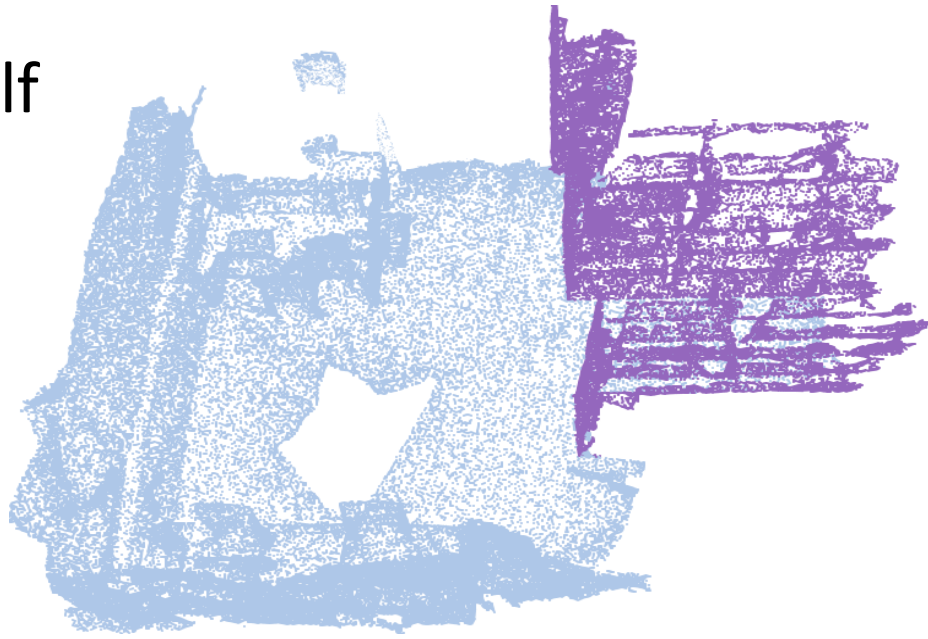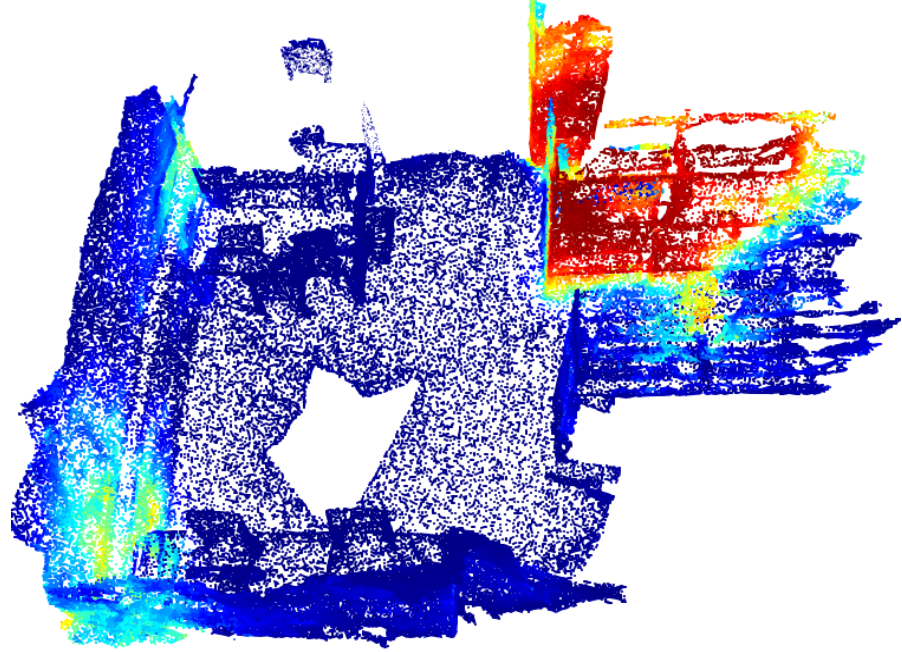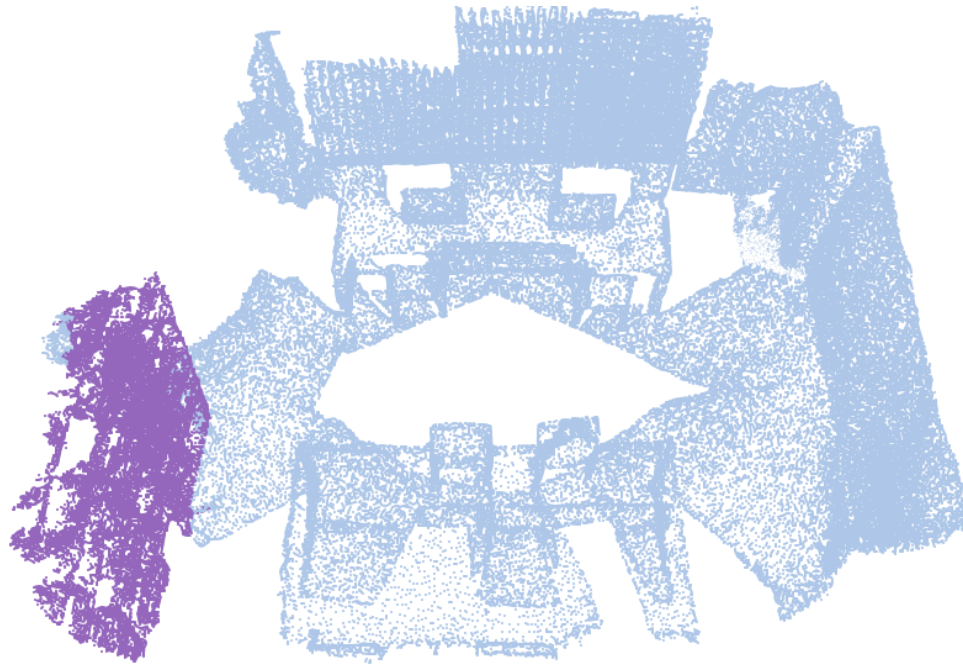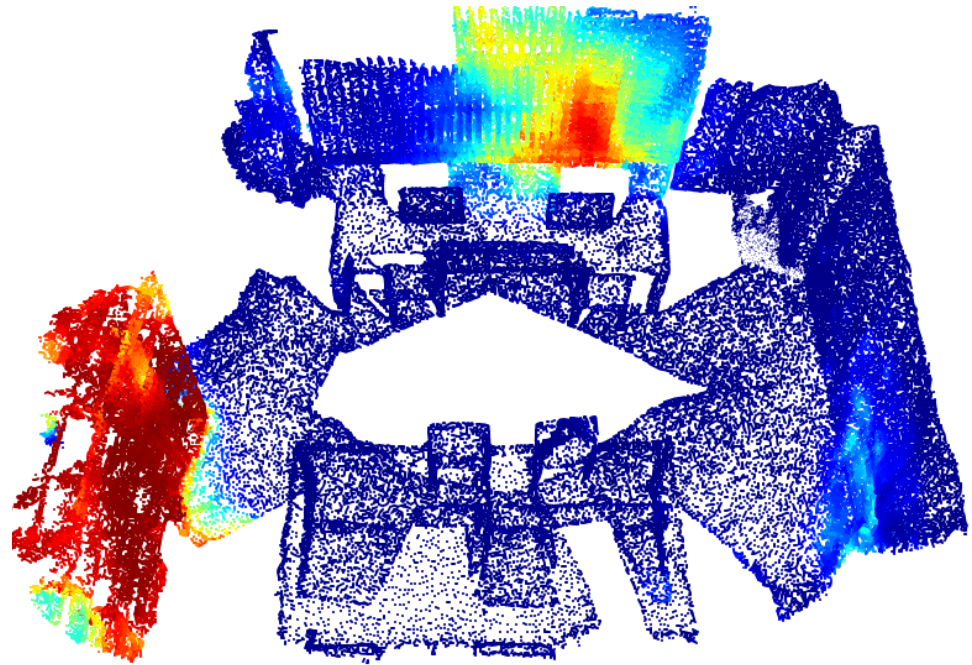



Bookshelf

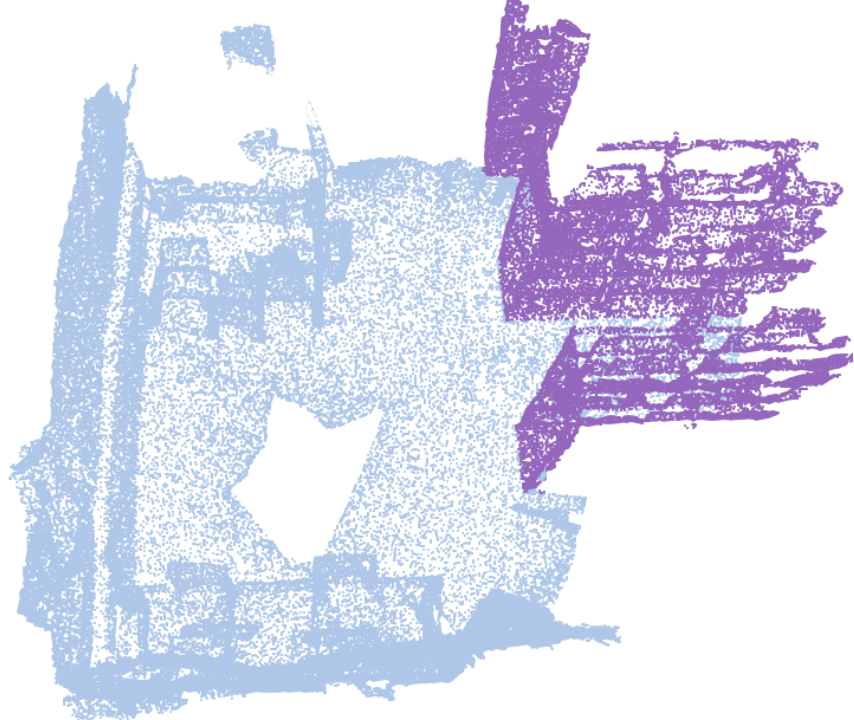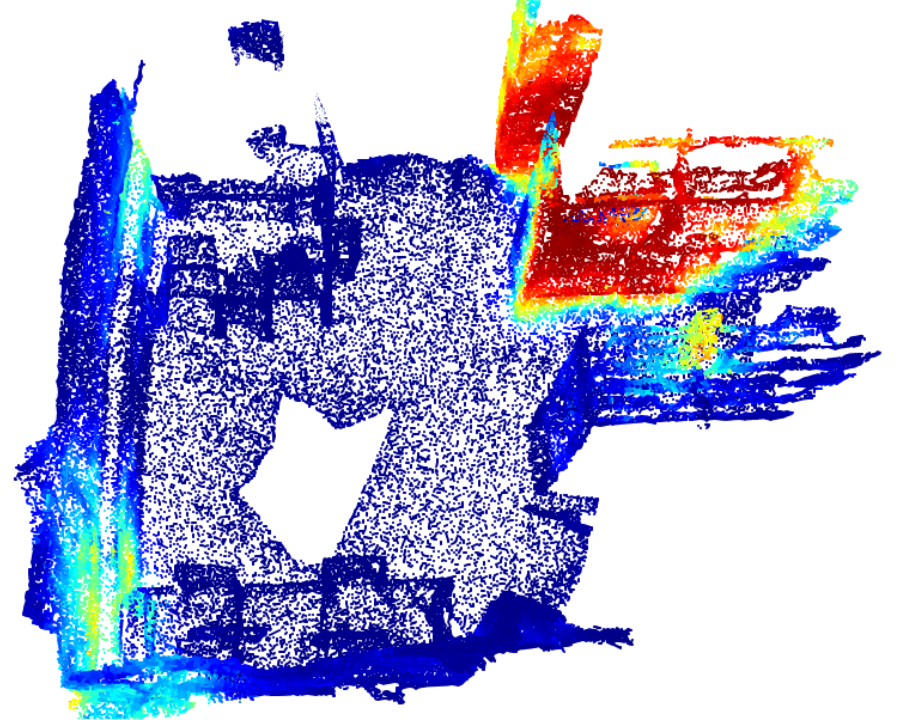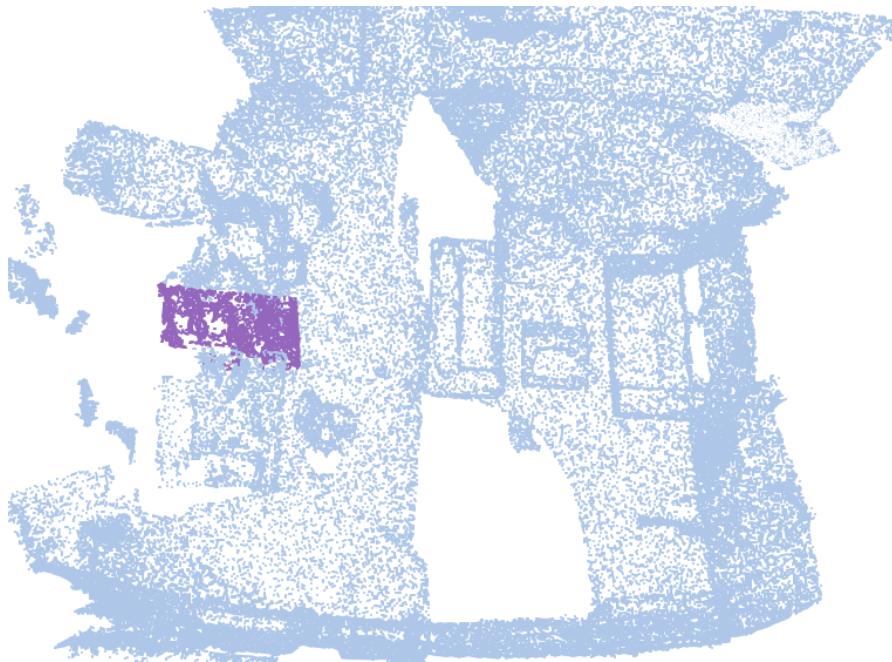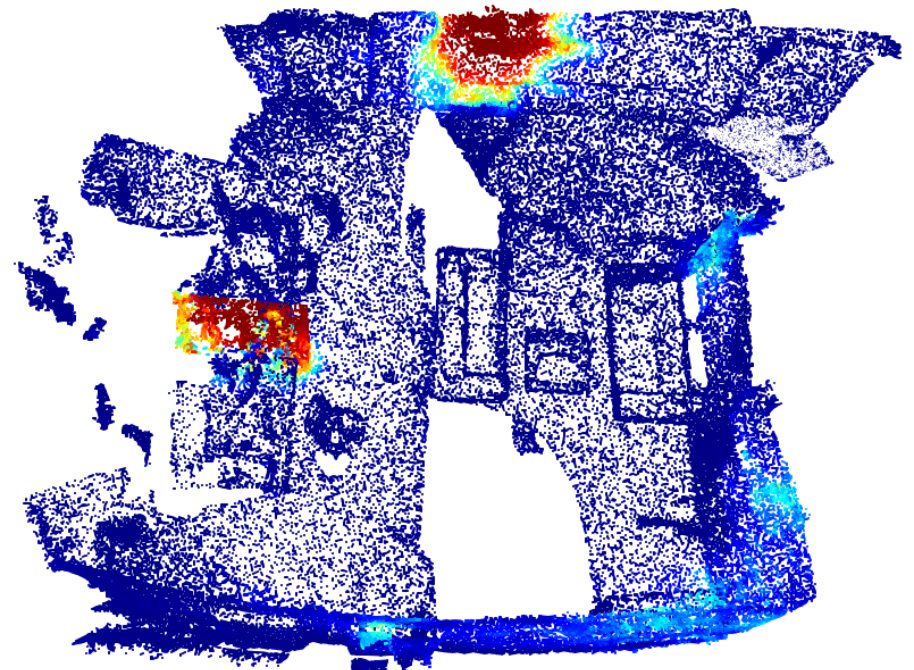



Bookshelf

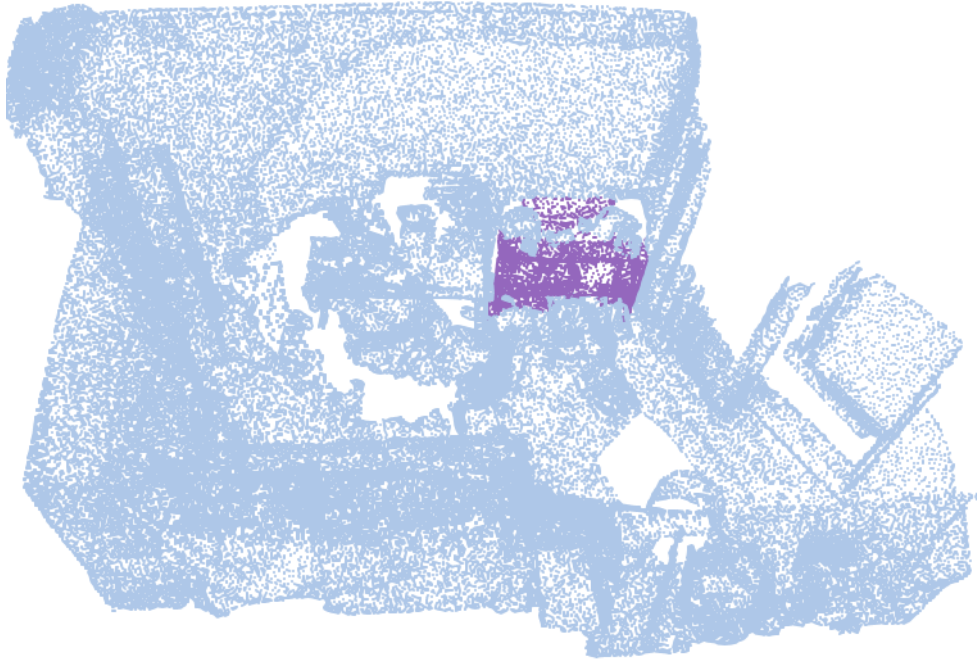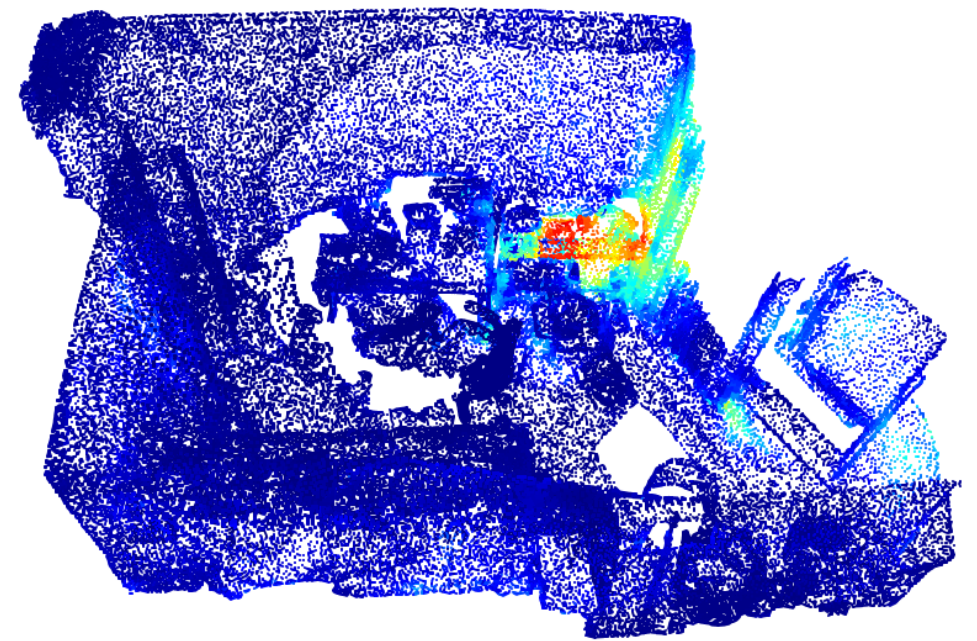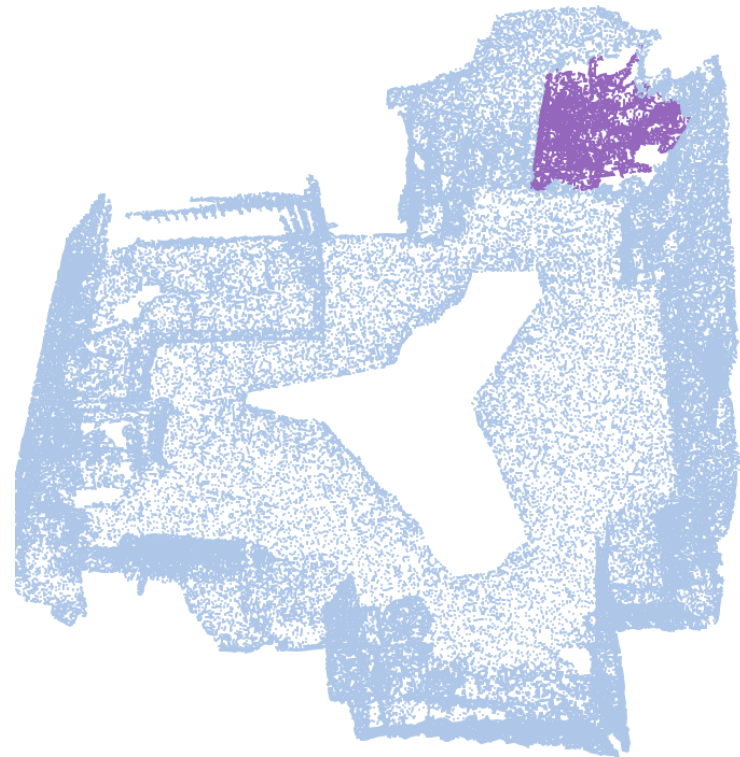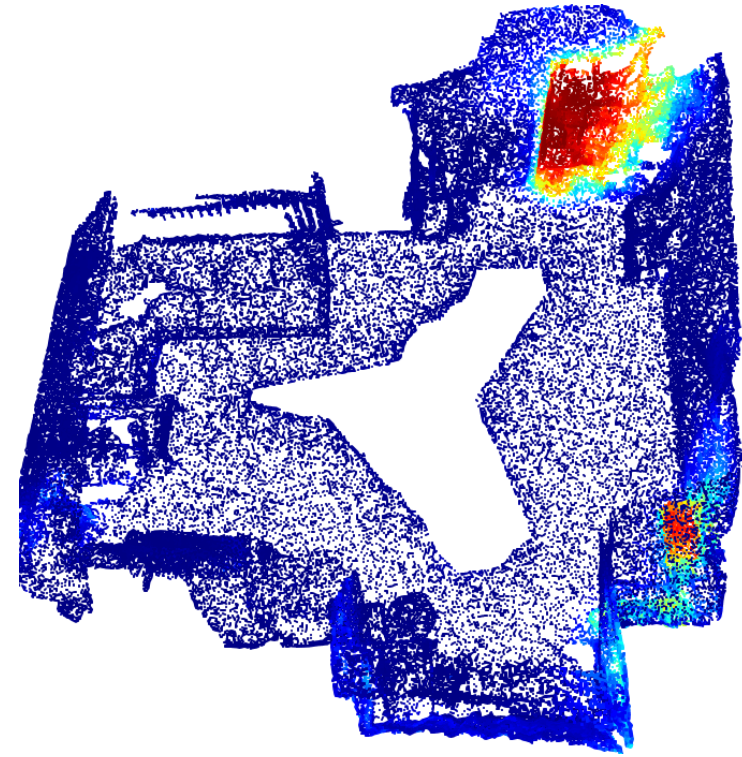



Sofa

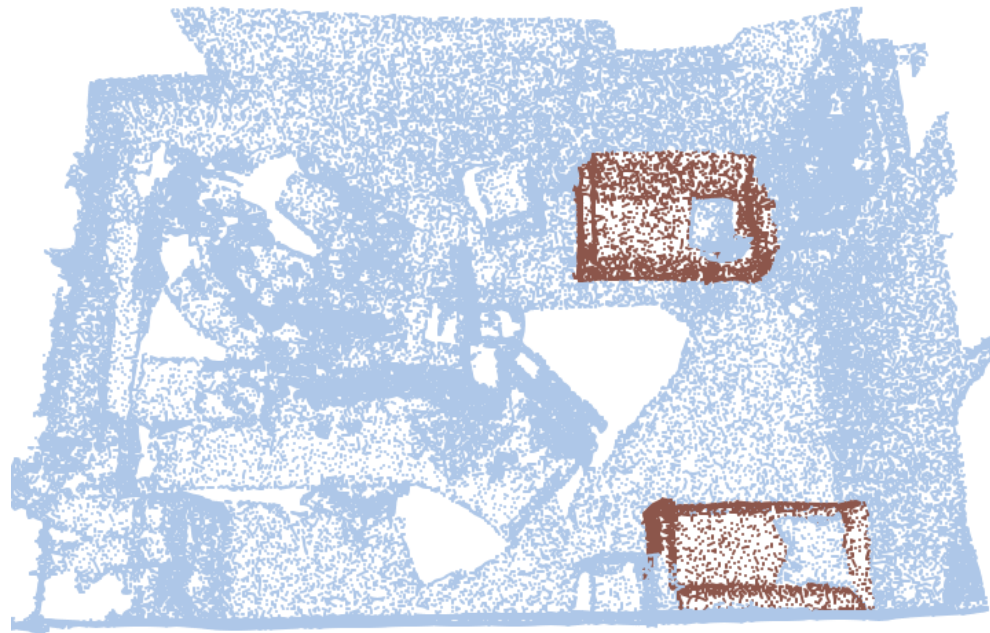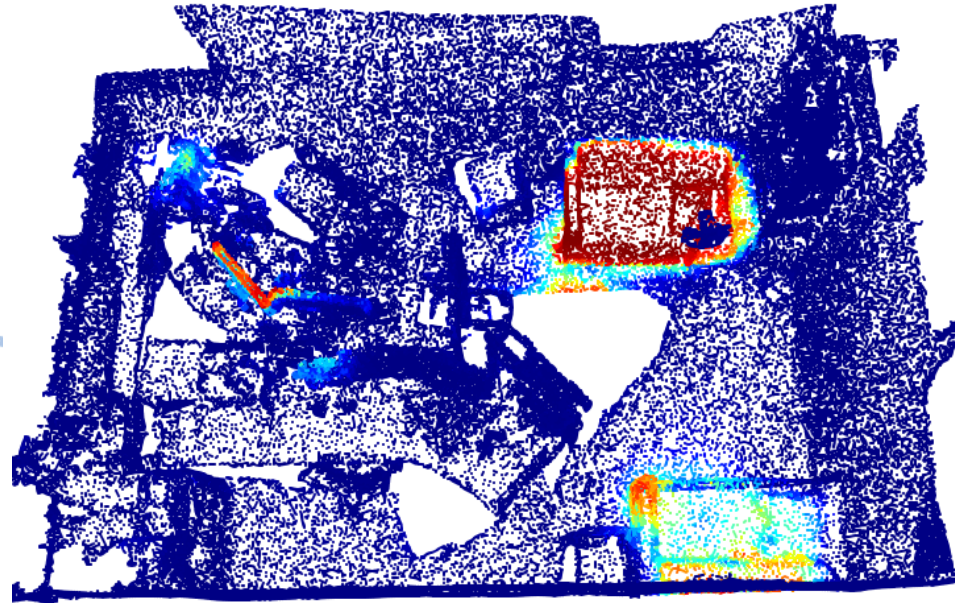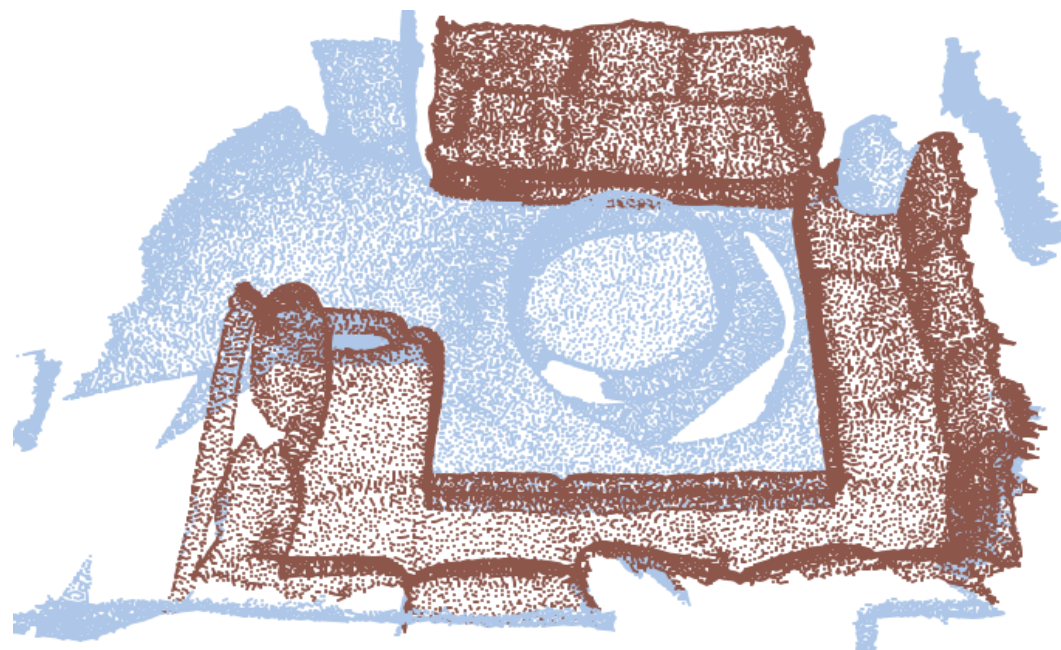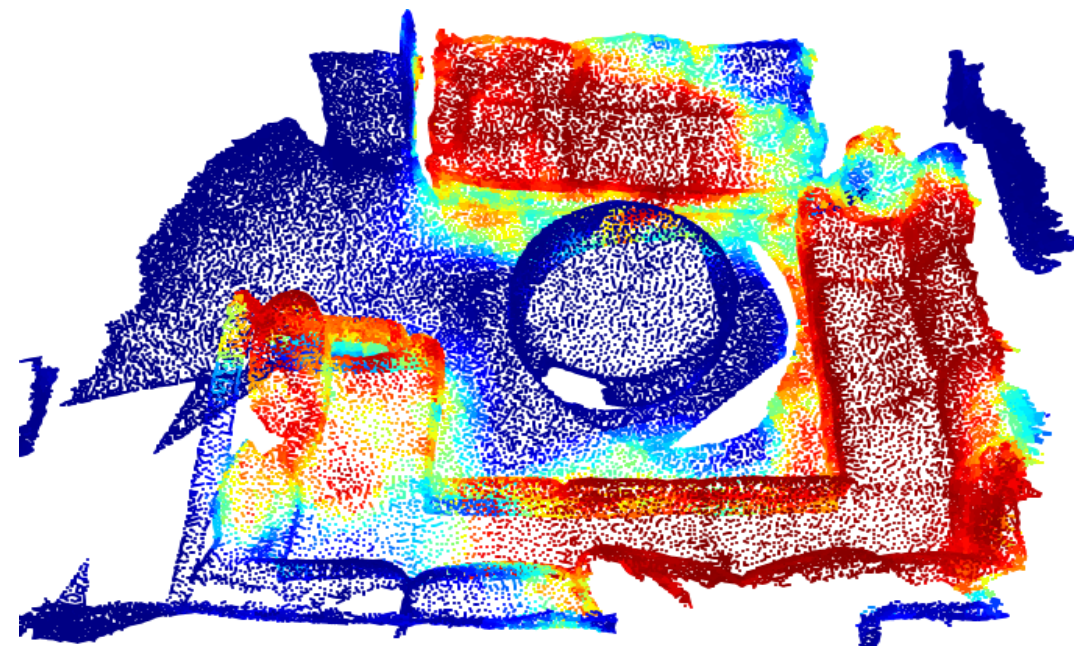



Sofa

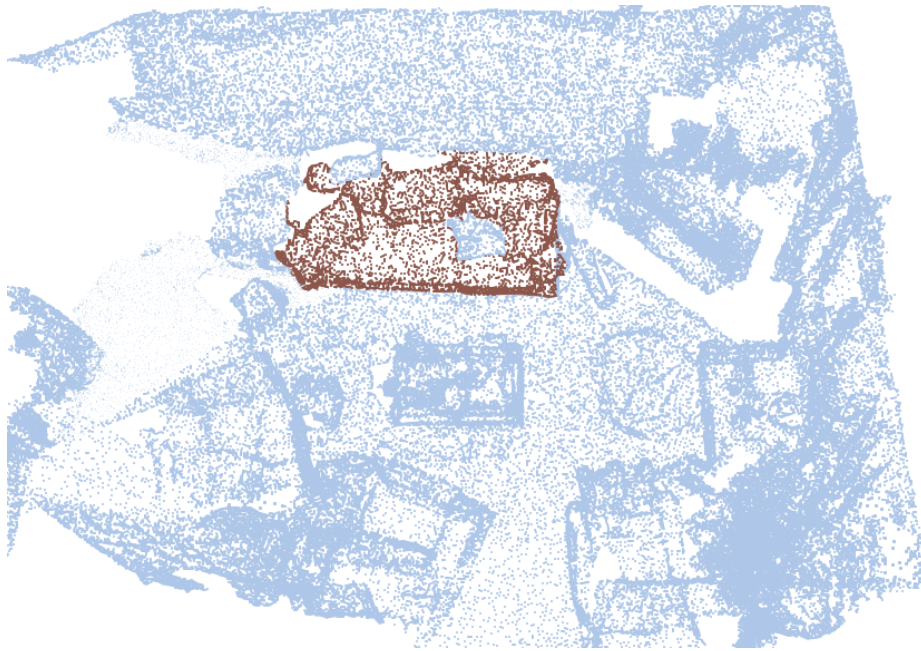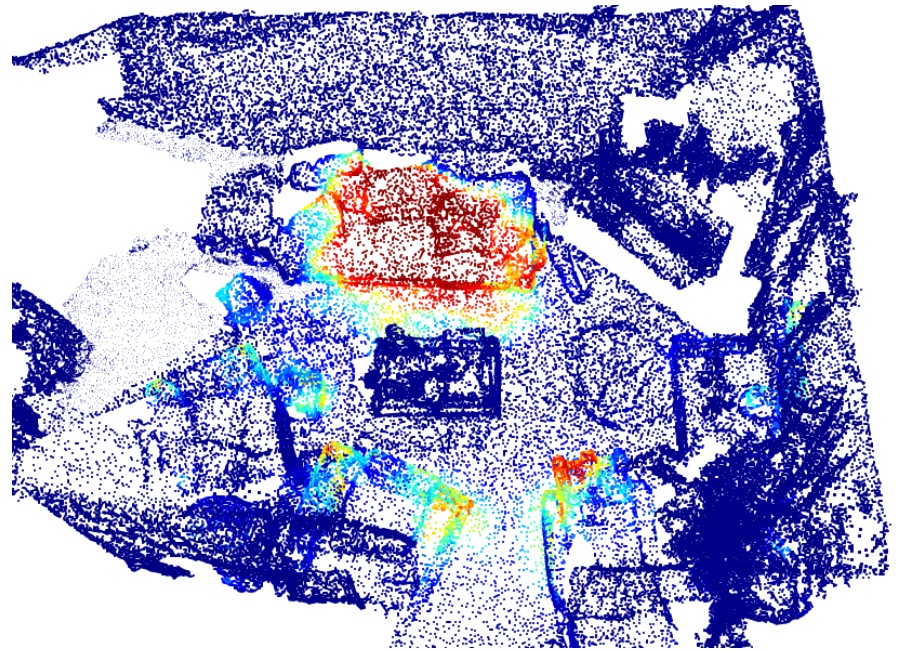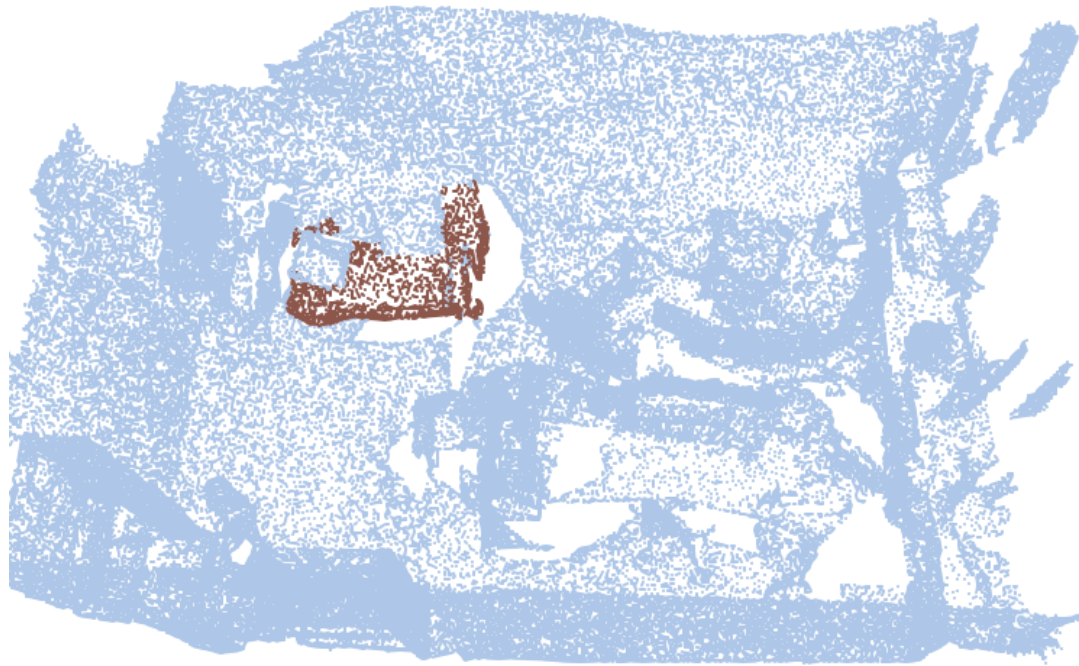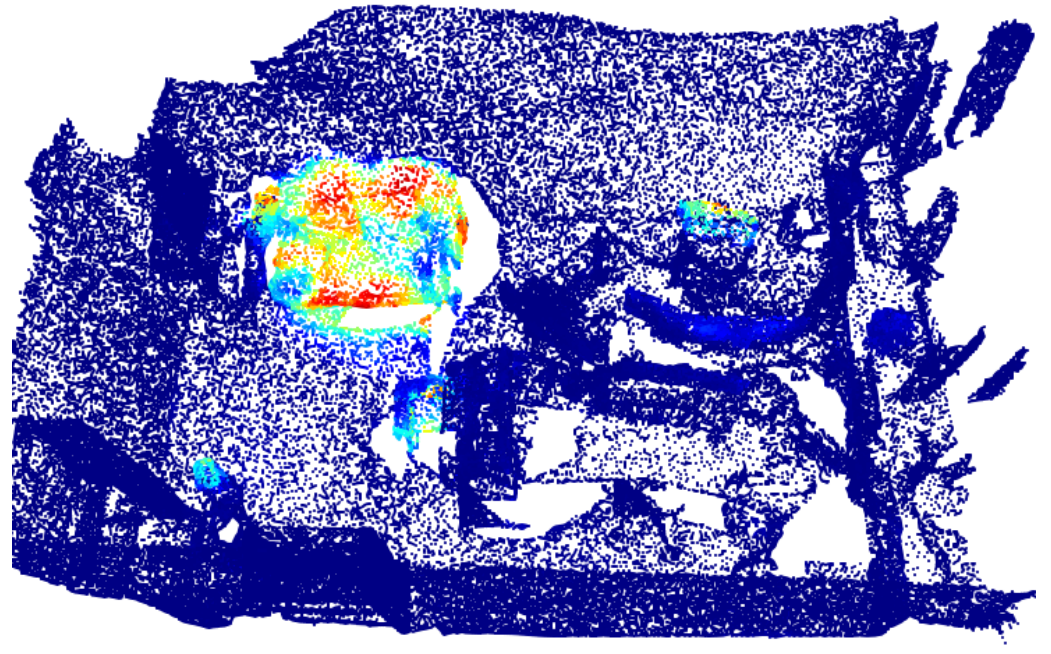



Sofa

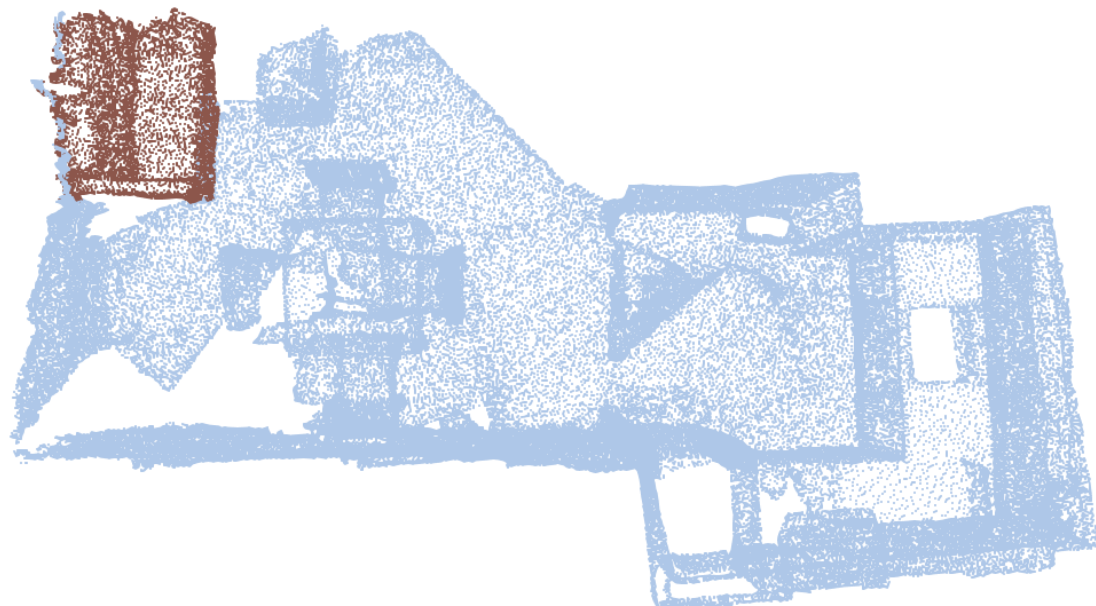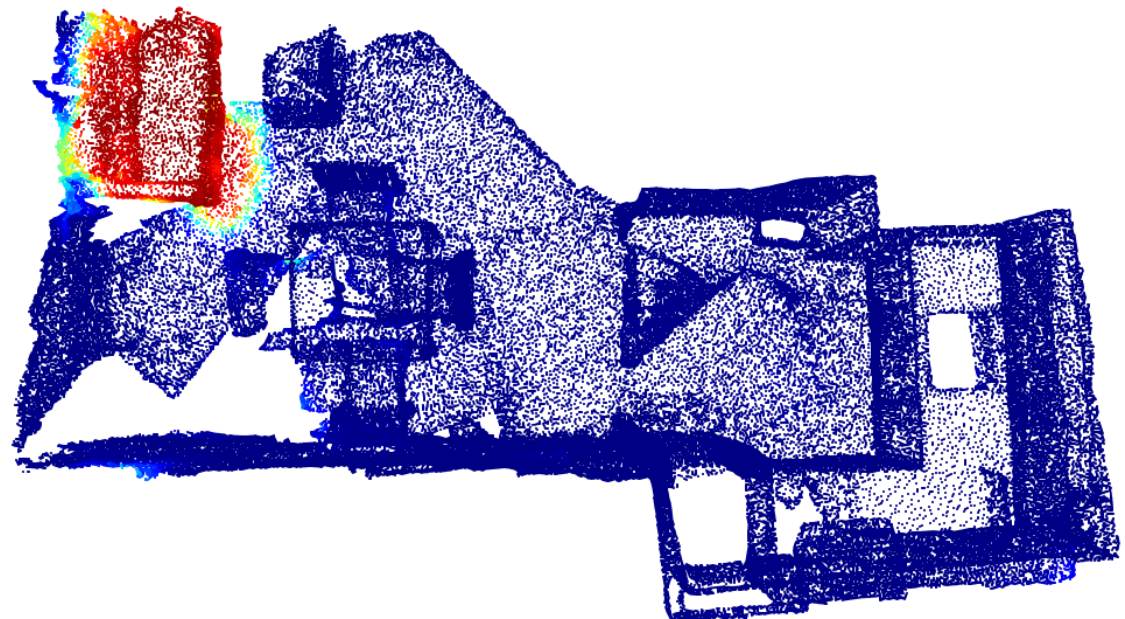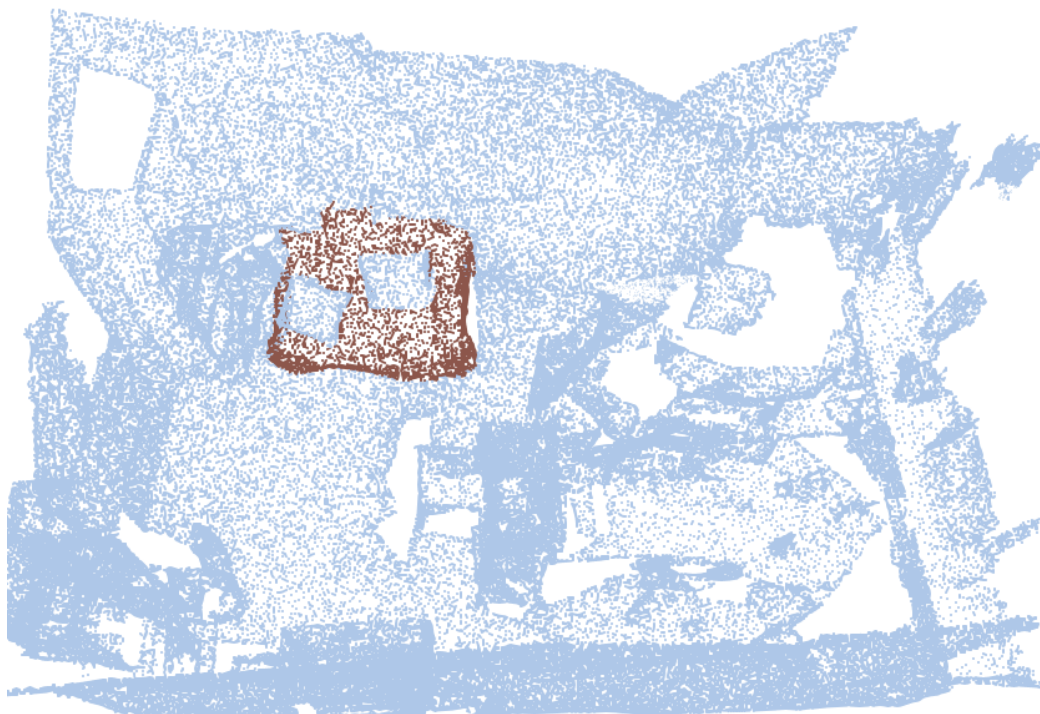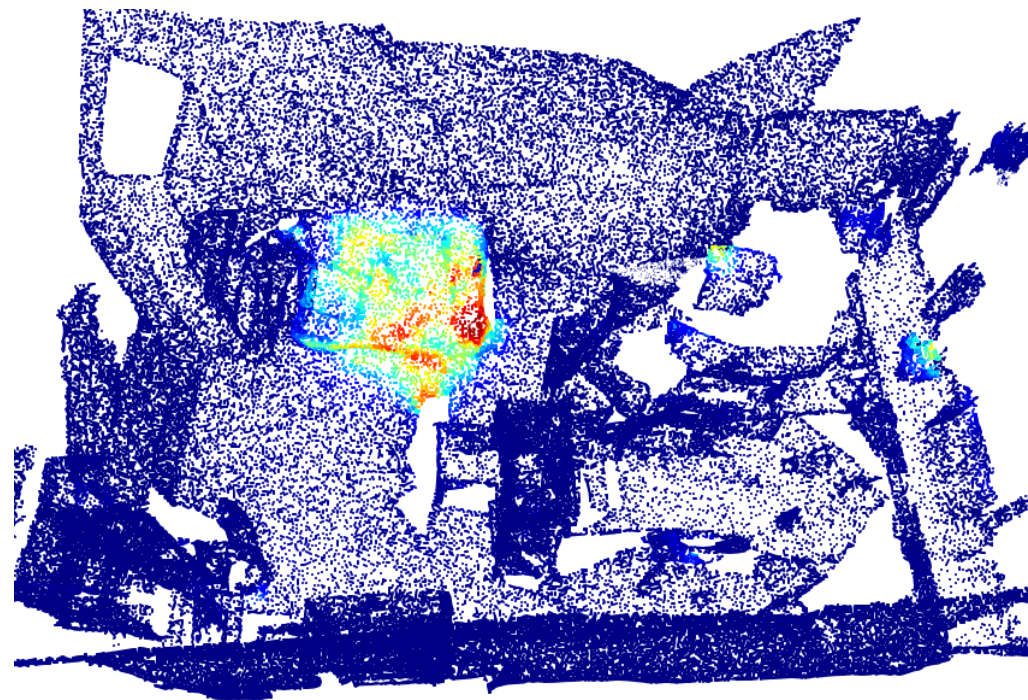



table

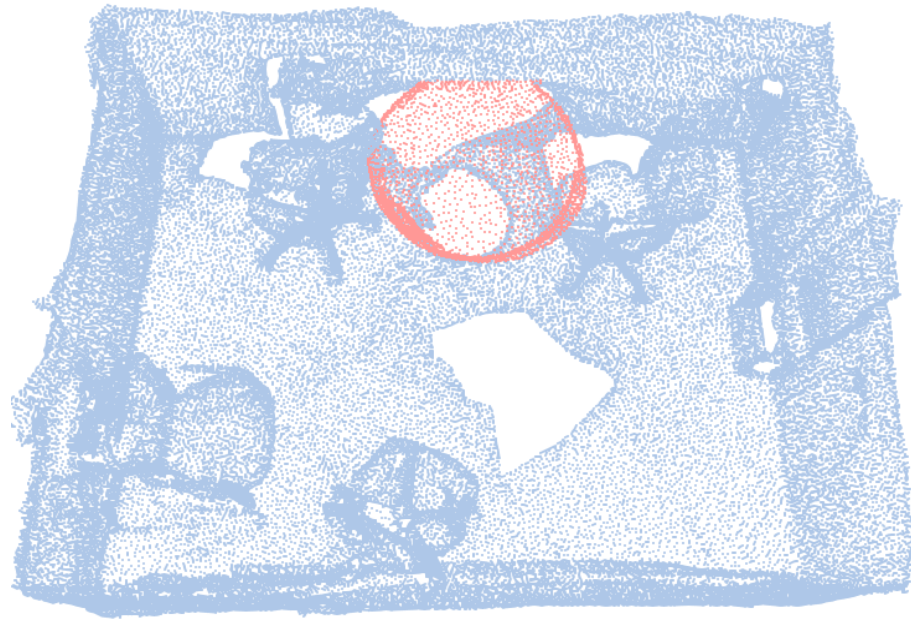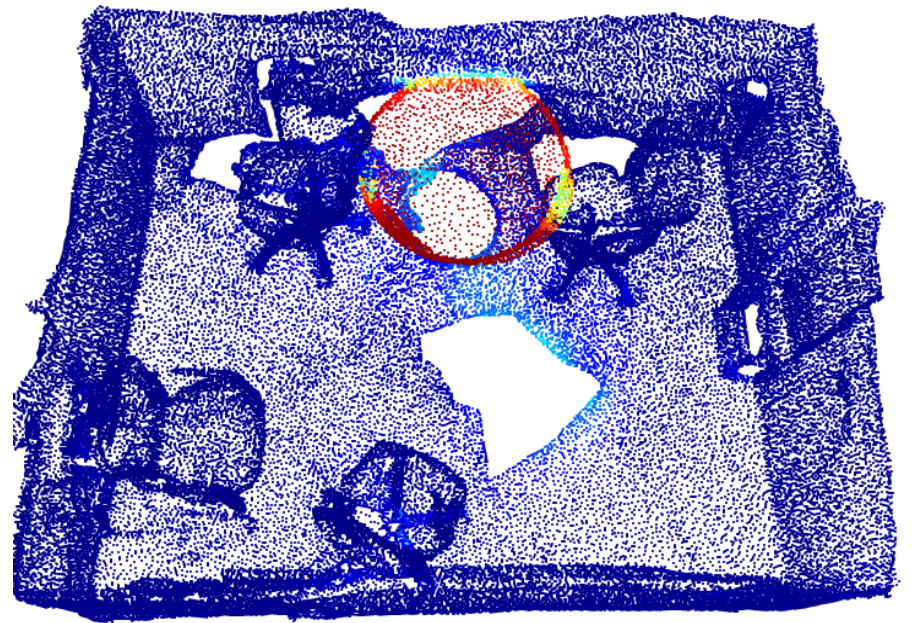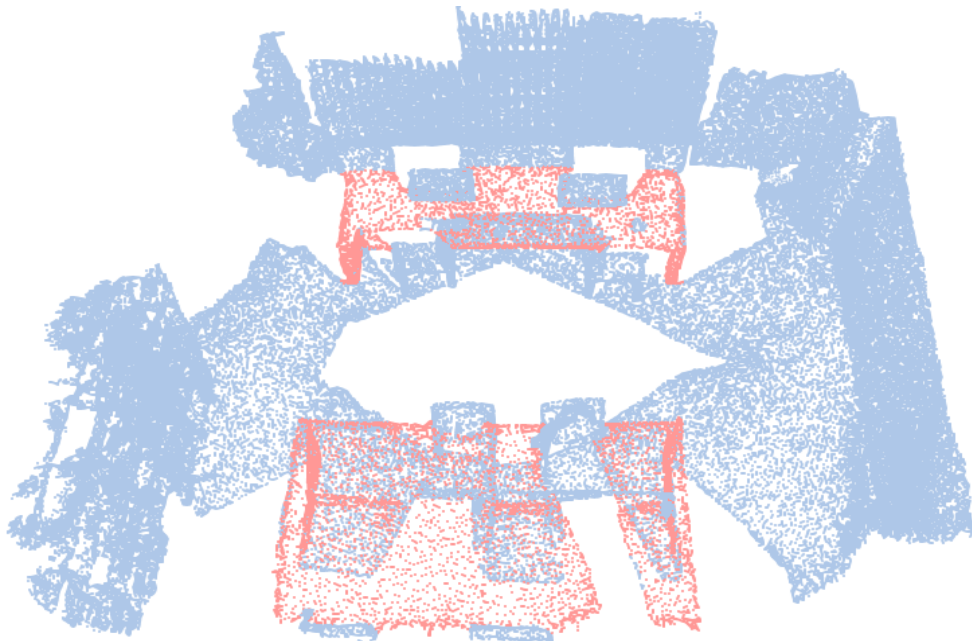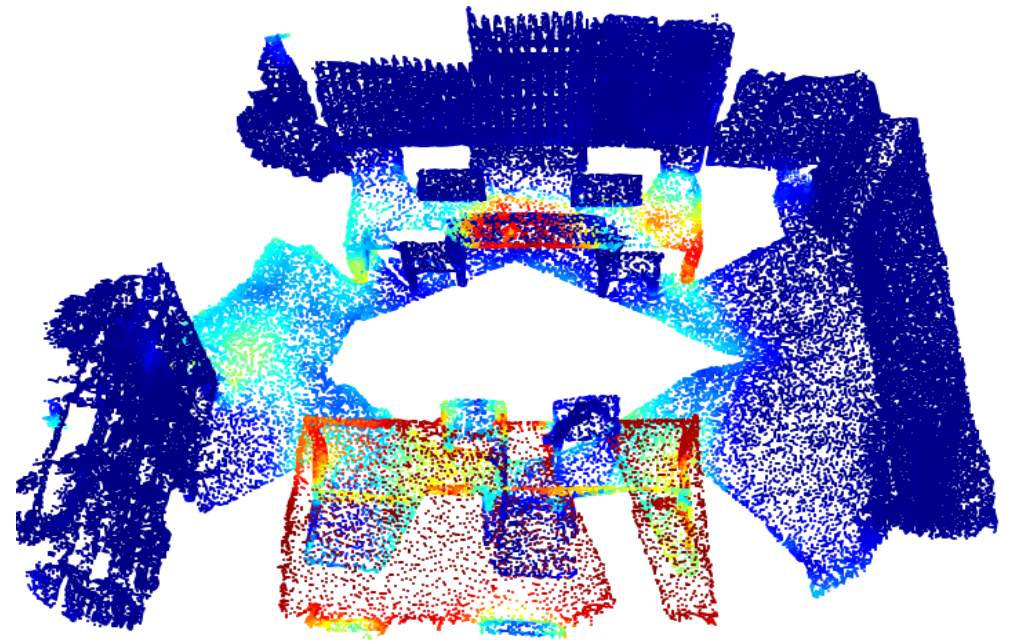



table

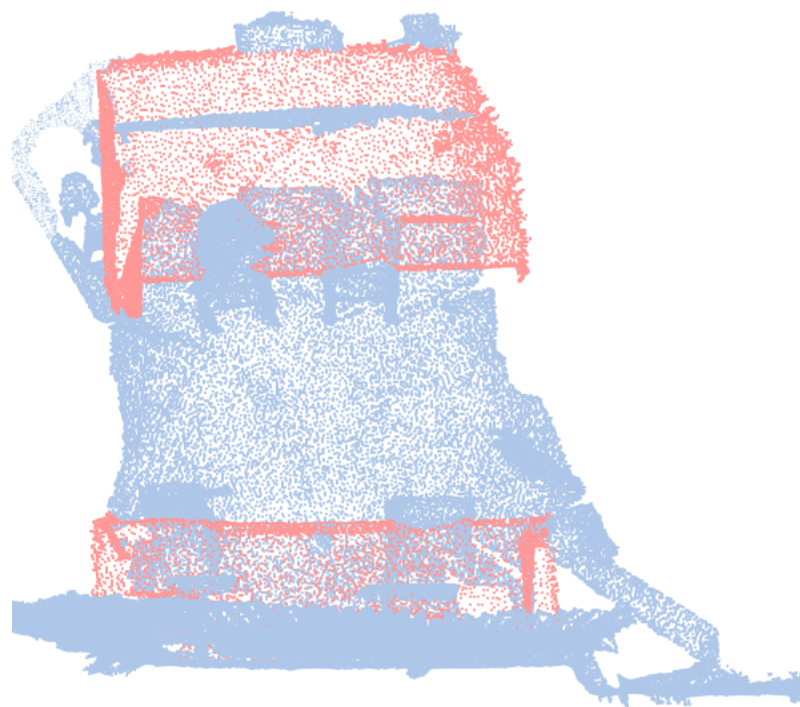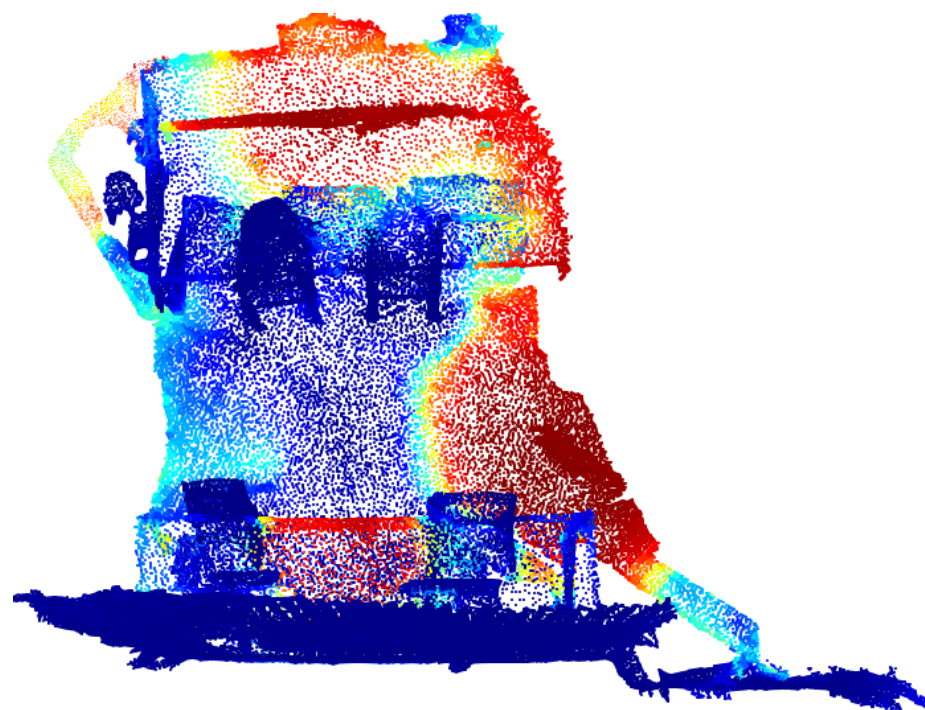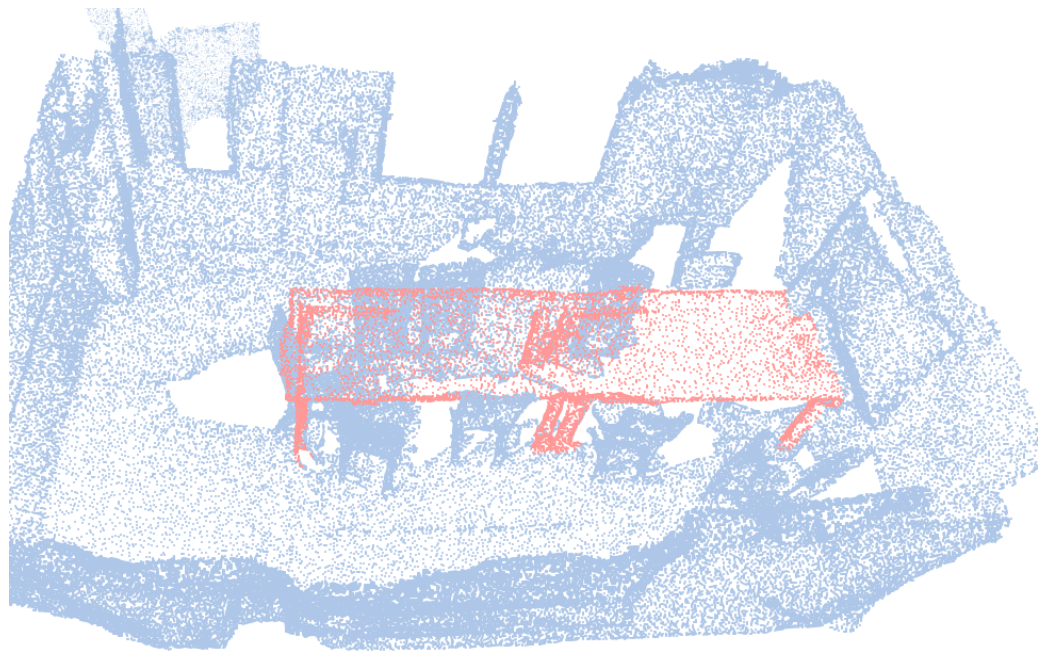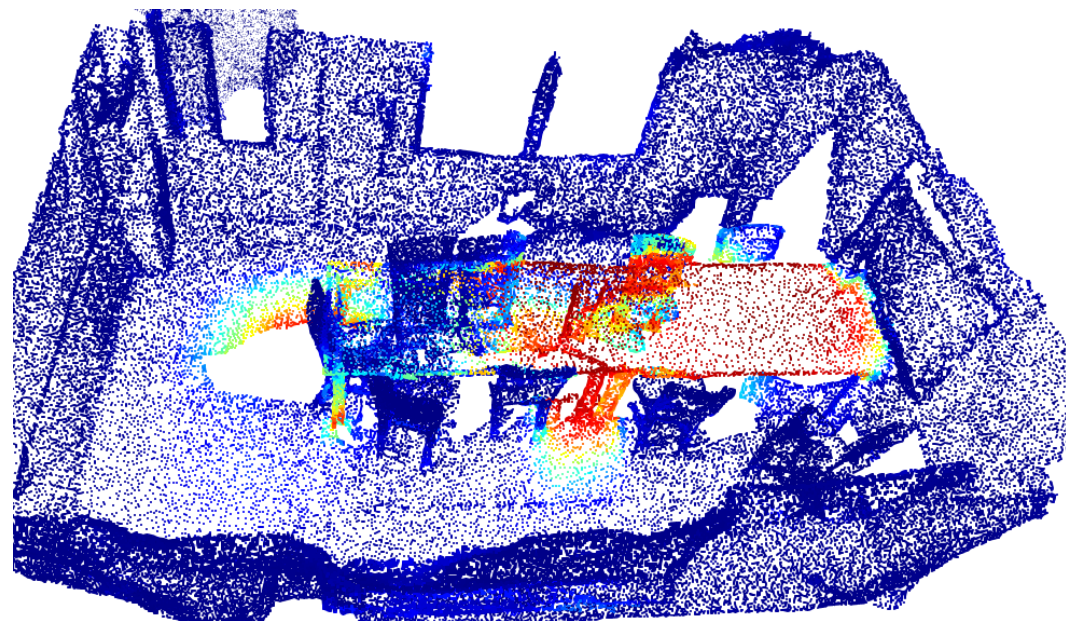



table

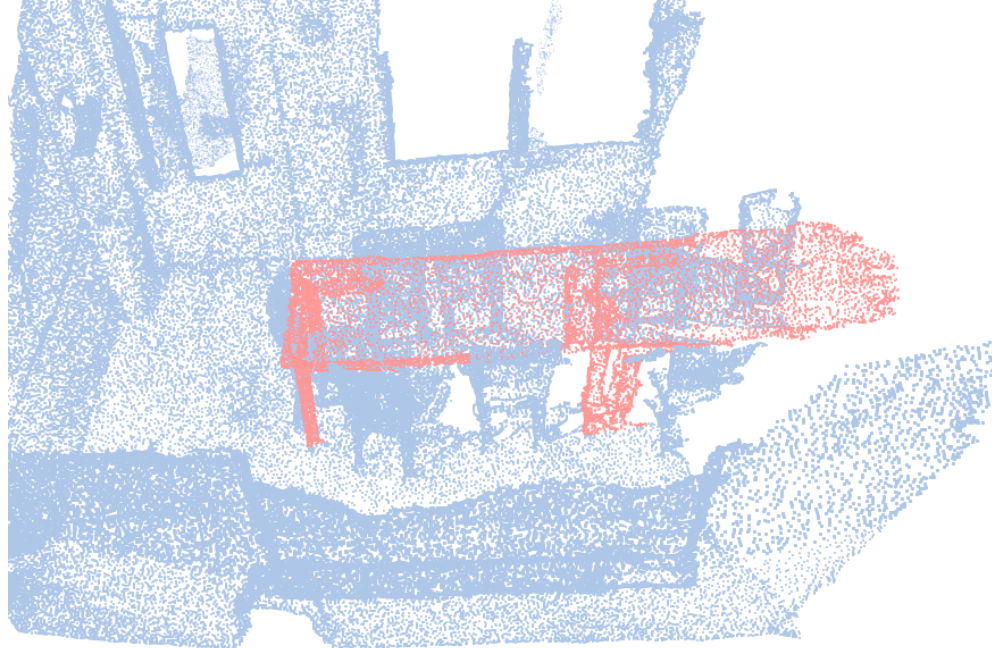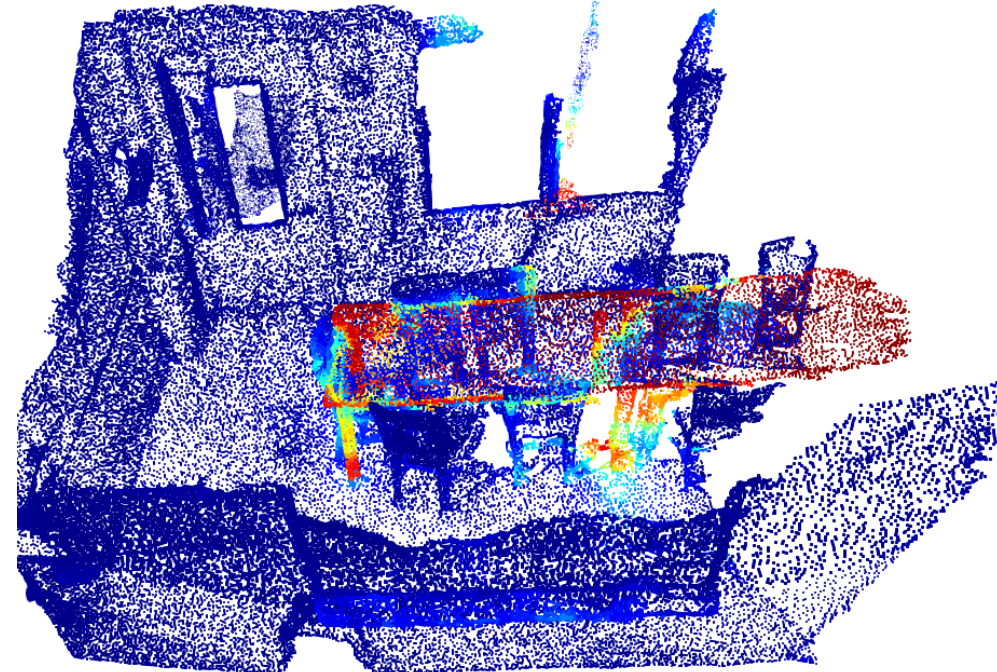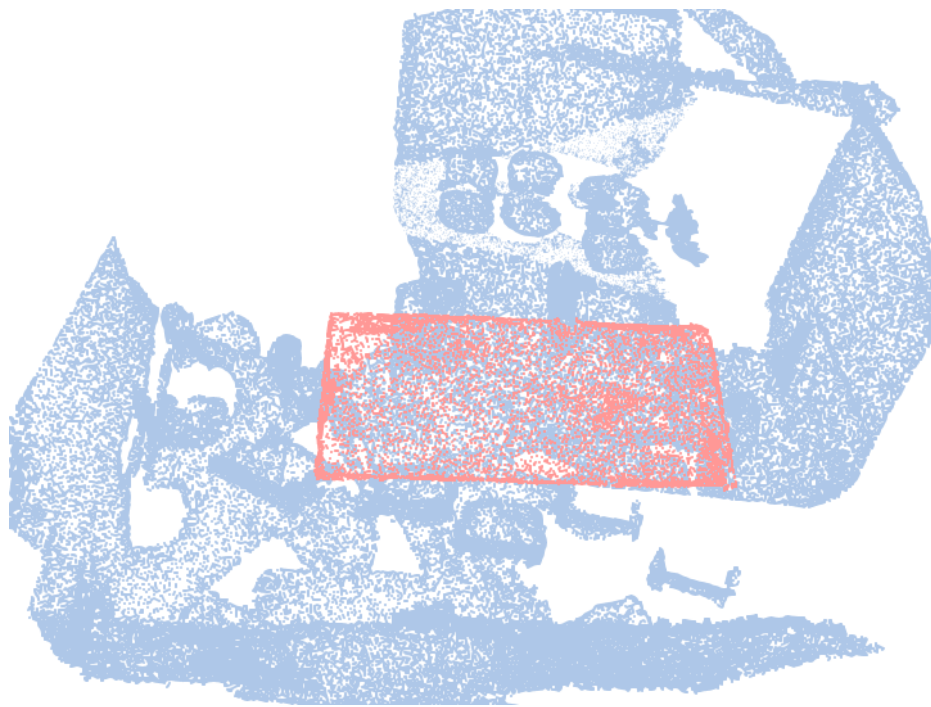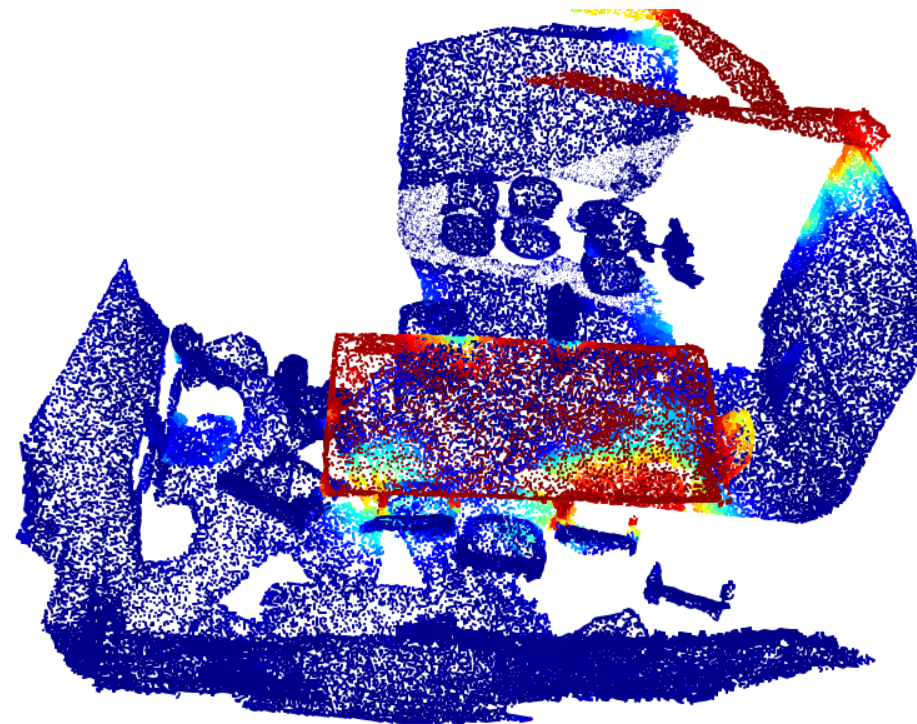



table

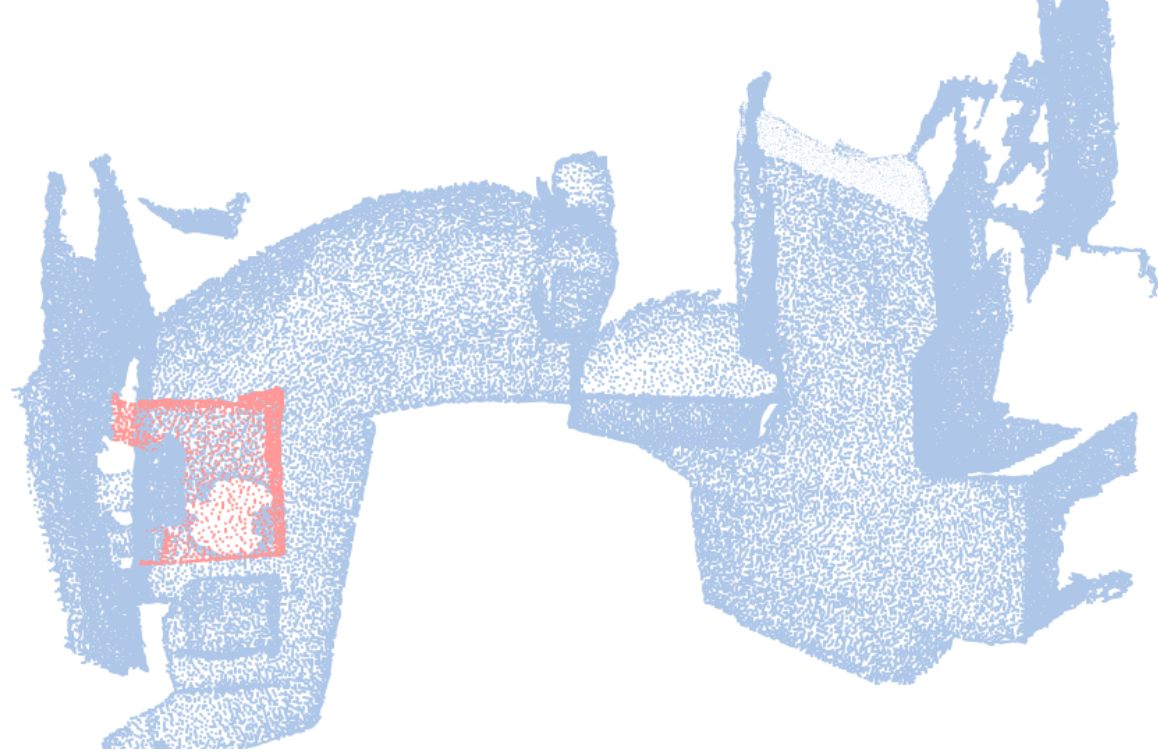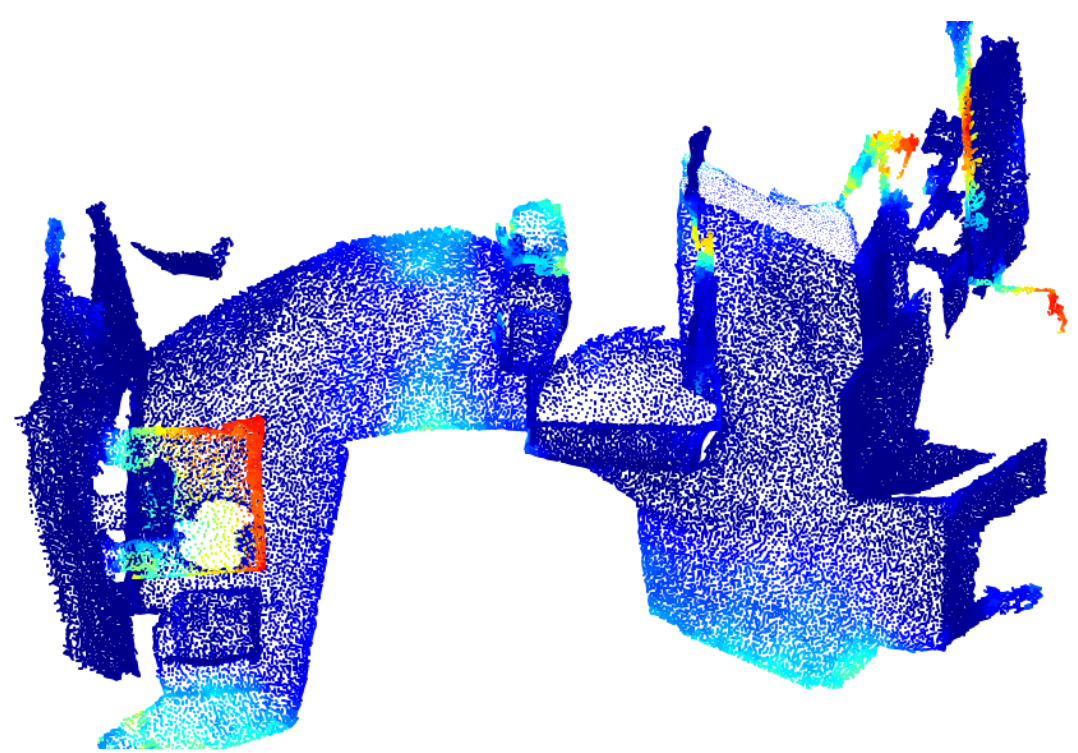

Supplement: supplementary_material [file attachment]
